# Supplementary material
Source: publisher figshare collection journal article supplement (https://acs.figshare.com/ndownloader/files/16610264)
Supplement: Supplementary file 1 [file 16610264]

## **Supporting information**

# **Block copolymer-coated ATR-FTIR spectroscopic sensors for monitoring hydrocarbons in aquatic environments at high temperature and pressure**

Charles Heath\*, Bobby Pejic and Matt B Myers

CSIRO, Energy, 26 Dick Perry ave, Kensington, WA, 6151, Australia

\*Corresponding author Tel: +61 8 6436 8922, Fax: +61 8 6436 8555, E-mail address:  
Charles.Heath@csiro.au.

### *Polymer film surface characterization*

To investigate the thermal stability of Kraton G-1650, a film was made on a glass slide was subjected to different temperatures and images collected using an optical microscope (Figure S1). 10 $\mu$ l of a solution of Kraton G-1650 in CHCl<sub>3</sub> (10mg/mL) was dropped onto a glass slide and allowed to dry for 2 hours. This polymer film was then photographed using a Nikon eclipse LV100N POL optical microscope at 25x magnification. The same glass slide was then placed into pure water for 24 hours at 22°C, removed and allowed to dry and photographed again in the same area. This was repeated at different temperatures.

### *FTIR of polymer films at different temperatures*

FTIR spectra of polymer films in the absence of aqueous solutions between 22-80°C and ambient pressure were recorded using the Bruker Alpha with diamond ATR (Figures S2 and S3). The diamond ATR is equipped with a heater and thermocouple controller that may be adjusted using the software OPUS. A new background was acquired at each temperature and a polymer film was then drop cast onto the diamond (10 $\mu$ l of a 50mg polymer in 5ml CHCl<sub>3</sub> solution). The film was allowed half an hour to stabilize at the required temperature and the spectrum then recorded.

*Table S1 Parameters of linear regression for the toluene calibrations of the various polymer films studied.*

| <b>Toluene</b> | Styrene/Isoprene    | Styrene/butadiene   | Kraton G-1650        | PIB                 |
|----------------|---------------------|---------------------|----------------------|---------------------|
| Intercept      | -0.0043 $\pm$ 0.004 | -0.0007 $\pm$ 0.003 | -0.00012 $\pm$ 0.007 | -0.0016 $\pm$ 0.006 |
| Slope          | 0.0039 $\pm$ 0.0002 | 0.0027 $\pm$ 0.0002 | 0.0069 $\pm$ 0.0004  | 0.0039 $\pm$ 0.0003 |
| R <sup>2</sup> | 0.99                | 0.99                | 0.99                 | 0.99                |

Table S2 Parameters of linear regression for the toluene and naphthalene calibrations of Kraton G-1650 at 137 bar, 22-80°C.

| <b>Toluene</b>     | 22°C            | 40°C            | 60°C            | 80°C            | 22°C repeat     |
|--------------------|-----------------|-----------------|-----------------|-----------------|-----------------|
| Intercept          | 0.0077 ± 0.016  | 0.0068 ± 0.013  | 0.0031 ± 0.010  | 0.0127 ± 0.004  | 0.0046 ± 0.007  |
| Slope              | 0.0148 ± 0.0006 | 0.0122 ± 0.0005 | 0.009 ± 0.0004  | 0.0016 ± 0.0001 | 0.0047 ± 0.0002 |
| R <sup>2</sup>     | 0.99            | 0.99            | 0.99            | 0.99            | 0.99            |
| <b>Naphthalene</b> |                 |                 |                 |                 |                 |
| Intercept          | -               | 0.0146 ± 0.025  | 0.0063 ± 0.014  | 0.0153 ± 0.005  | -               |
| Slope              | -               | 0.0749 ± 0.0054 | 0.0411 ± 0.0029 | 0.0096 ± 0.0008 | -               |
| R <sup>2</sup>     | -               | 0.99            | 0.99            | 0.99            | -               |

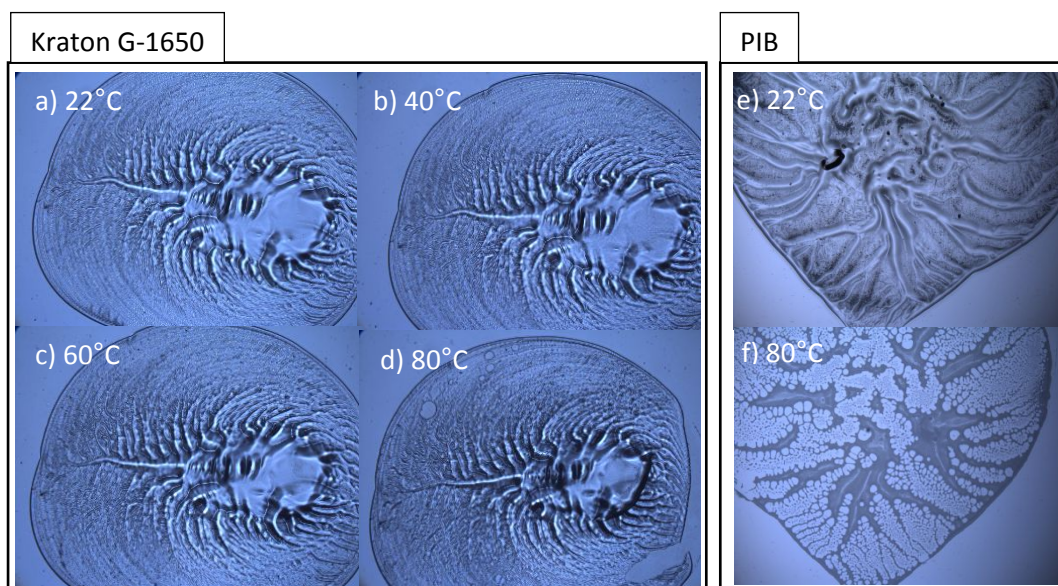

Figure S1 Optical images of a Kraton G-1650 drop cast film after exposing it to water for 24 hours at: a) 22°C b) 40°C c) 60°C d) 80°C at 1 bar (left) and optical images of a PIB drop cast film after exposing it to water for 24 hours at: e) 22°C f) 80°C at 1 bar (Anal. Chem. 2017, 89, 13391–13397).

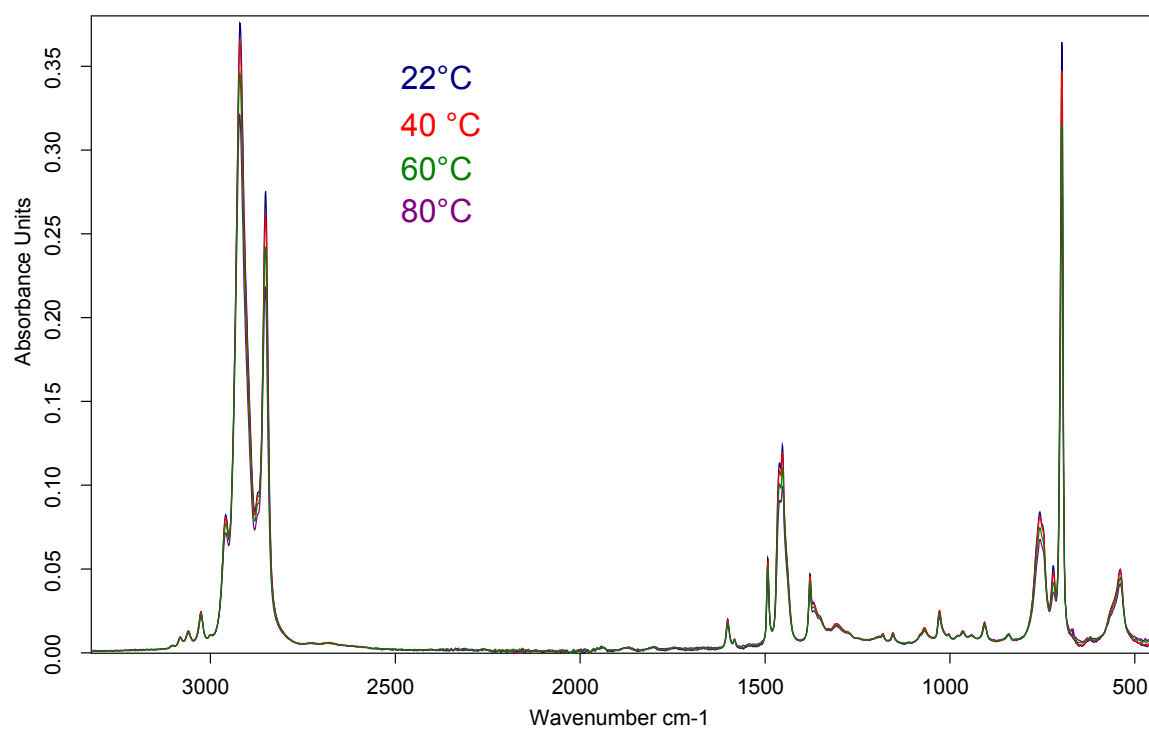

*Figure S2 FTIR spectra of Kraton G-1650 recorded at 22, 40, 60 and 80°C at ambient pressure in the absence of aqueous solutions.*

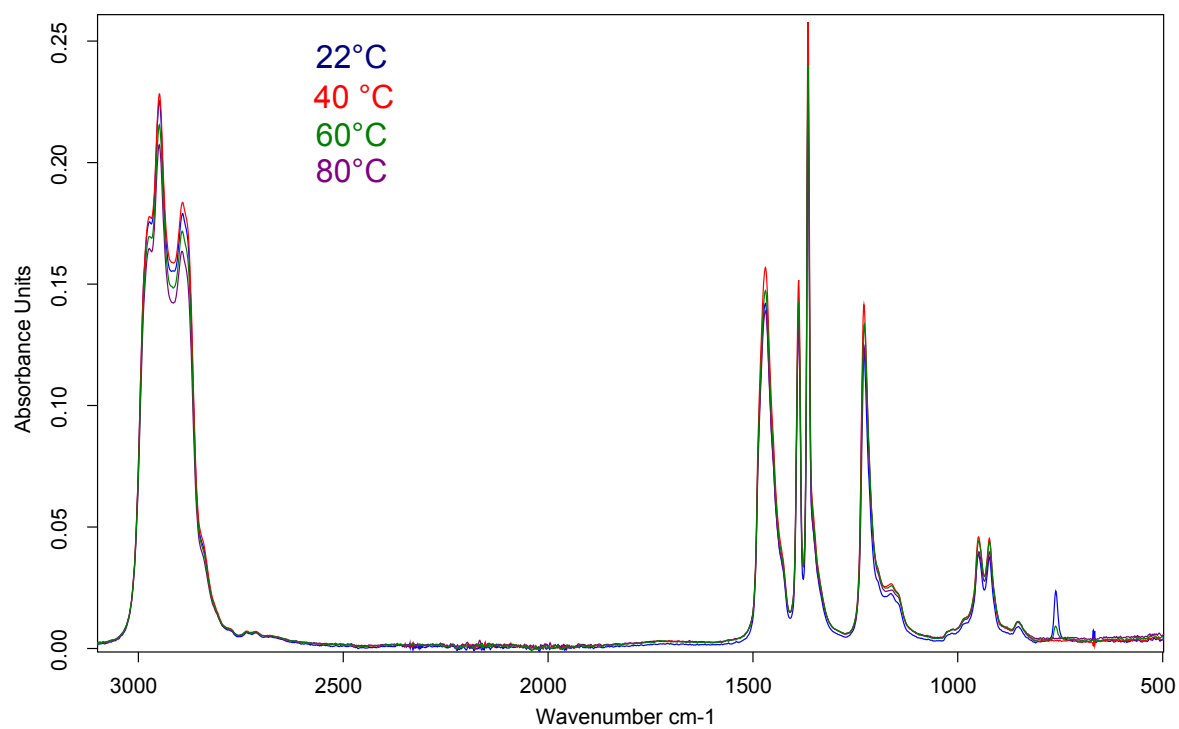

Figure S3 FTIR spectra of pure polyisobutylene recorded at 22, 40, 60 and 80 °C at ambient pressure in the absence of aqueous solutions. Peak at 761 cm<sup>-1</sup> is due to residual CHCl<sub>3</sub>.
